# Supplementary material for: Identification of apelin/APJ signaling dysregulation in a human iPSC-derived granulosa cell model of Turner syndrome
Source: PubMed Central journal article supplement (PMC11564969; doi:10.1038/s41420-024-02231-9), 2024-11-14
Supplement: 41420_2024_2231_MOESM1_ESM.pdf [file 41420_2024_2231_MOESM1_ESM.pdf]

## Supplement figures

# Identification of apelin/APJ signaling dysregulation in a human iPSC-derived granulosa cell model of Turner syndrome

Wei-Ju Chen<sup>1</sup>, Yi-Ya Chao<sup>1</sup>, Wei-Kai Huang<sup>1</sup>, Wei-Fang Chang<sup>2,3</sup>, Chii-Ruey Tzeng<sup>2,3,4</sup>, Chi-Hsuan Chuang<sup>1</sup>, Pei-Lun Lai<sup>1</sup>, Scott C. Schuyler<sup>5</sup>, Long-Yuan Li<sup>6,10</sup>, Jean Lu<sup>1,7,8,9,10</sup>

## Affiliations

<sup>1</sup> Genomics Research Center, Academia Sinica, Taipei 11529, Taiwan

<sup>2</sup> Taipei Fertility Center, Taipei 110, Taiwan

<sup>3</sup> Taipei Medical Technology Co., Ltd., Taipei 110, Taiwan

<sup>4</sup> Department of Obstetrics and Gynecology, School of Medicine, College of Medicine, Taipei Medical University, Taipei 110301, Taiwan

<sup>5</sup> Department of Biomedical Sciences, College of Medicine, Chang Gung University, Division of Head and Neck Surgery, Department of Otolaryngology, Chang Gung Memorial Hospital, Taoyuan 33302, Taiwan

<sup>6</sup> Department of Life Sciences, National Chung Hsing University, Taichung 402202, Taiwan

<sup>7</sup> Department of Biomedical Sciences and Engineering Tzu Chi University, Hualien 97004, Taiwan

<sup>8</sup> Graduate Institute of Medical Sciences, National Defense Medical Center Taipei 11490, Taiwan

<sup>9</sup> Genomics and System Biology Program, College of Life Science, National Taiwan University, 10617, Taiwan

<sup>10</sup> Corresponding author: Jean Lu, Long-Yuan Li

**Phone:** +886-2-2787-1247

**Email:** [jeanlu@gate.sinica.edu.tw](mailto:jeanlu@gate.sinica.edu.tw); [lyuan@dragon.nchu.edu.tw](mailto:lyuan@dragon.nchu.edu.tw)

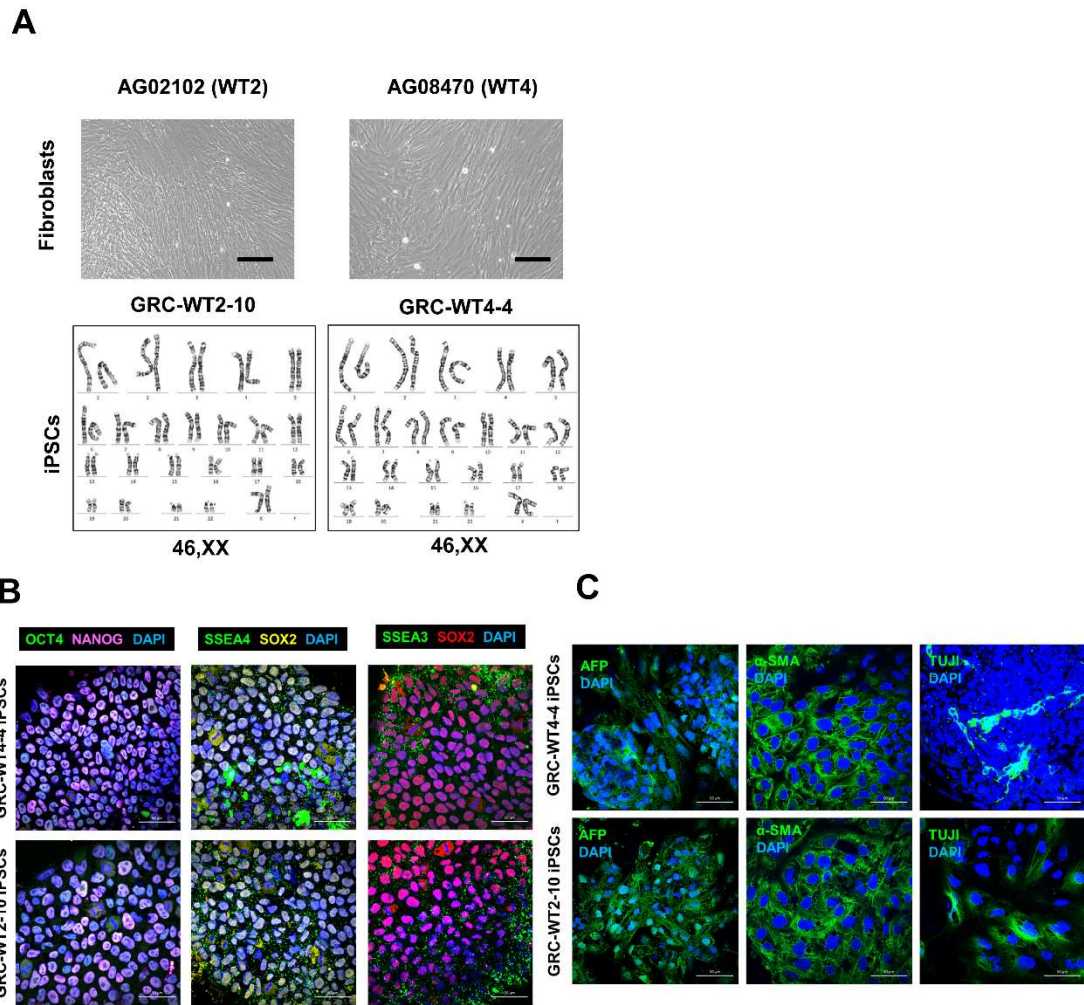

**Fig. S1 Characterization of iPSC reprogramming from healthy donor fibroblasts.**

(A) Karyotype analyses revealed that normal 46,XX in GRC-WT2-10 iPSCs and GRC-WT4-4 iPSCs reprogramming from parental fibroblasts. (B)

Immunofluorescence staining for pluripotency marker, OCT4, SOX2, NANOG,

SSEA4, SSEA3. Scale bar, 50  $\mu$ m. (C) An *in vitro* spontaneous differentiation assay

using embryonic bodies (EBs) formation (10% FBS, 10 days) was performed and

immunofluorescence staining for the trilineage markers for ectoderm (TUJ1),

endoderm (AFP), and mesoderm ( $\alpha$ -SMA). Scale bar, 50  $\mu$ m.
